# Supplementary material
Source: PubMed Central journal article supplement (PMC7081143)
Supplement: jamadermatol-156-593-s001.pdf [file jamadermatol-156-593-s001.pdf]

## Supplementary Online Content

Jia JL, Nord KM, Sarin KY, Linos E, Bailey EE. Sexual and gender minority curricula within US dermatology residency programs. *JAMA Dermatol*. Published online March 18, 2020. doi:10.1001/jamadermatol.2020.0113

### **eAppendix.** Sexual and Gender Minority Curricula and Diversity Survey

This supplementary material has been provided by the authors to give readers additional information about their work.

**eAppendix.** Sexual and Gender Minority Curricula and Diversity Survey

**SURVEY INSTRUMENT**

Expected time: approximately 3-4 minutes

**Purpose:** To determine how many programs have integrated instruction on sexual and gender minority (also known as Lesbian, Gay, Bisexual, Transgender, and Queer/LGBTQ) health concerns into their curriculum. To guide future educational efforts in sexual and gender minority education in dermatology residency curricula.

1. Which region of the United States is your dermatology program located in?
  - Northeast
  - Southeast (including Texas)
  - Southwest
  - Pacific Northwest (including California, Idaho, Montana, Hawaii, and Alaska)
  - Midwest
2. What is the approximate size of your residency program?
  - 1-3 total residents
  - 4-8
  - 9-15
  - 16+
3. Which aspects of Sexual and Gender Minority (SGM) care are covered in your residency program curriculum? [yes checkbox]
  - Pronoun use and identifiers for SGM patients
  - Comprehensive SGM-oriented history taking and physical exam
  - Intersectionality of SGM with race, ethnicity, age, religion, nation of origin, and/or socioeconomic status
  - Skin cancer risk among sexual minority men and women
  - Effects of hormone therapy on skin and hair of transitioning **male to female** patients
  - Effects of hormone therapy on skin and hair of transitioning **female to male** patients
  - Dermatologic concerns in regards to gender-confirming surgeries
  - Injectable/neurotoxin and filler for facial modification in transitioning patients
  - Dermatologic conditions secondary to HIV/AIDS
  - Dermatologic concerns associated with puberty blockers for pediatric patients
4. How many average hours per year are dedicated to SGM content in your program's curriculum?
  - 0
  - 1-2
  - 3-5
  - 6-10
  - 11+
5. In your opinion, how many average hours per year should be devoted to SGM issues?
  - 0
  - 1-2
  - 3-5
  - 6-10
  - 11+
  - Unsure
6. How important do you think it is for current trainees to receive training on SGM care?

- Very important
  - Somewhat important
  - Neutral
  - Not important
  - Don't know
7. Are you considering adding educational content on SGM dermatologic needs to your residency program within the next 5 years?
- Yes (If so, what specific content if this has been determined?)
  - No
  - Don't know
8. Please list any barriers you have encountered in integrating SGM disparities or topics into your curriculum and patient care?
- Lack of interested Faculty
  - Lack of experienced Faculty
  - Lack of funding
  - Lack of time
  - Lack of need
  - Lack of departmental culture to support inclusion
  - Lack of institutional culture to support inclusion
  - Other: \_\_\_\_\_
  - None
9. What do you think are the best ways to incorporate SGM dermatology content at your program?
- Online Training/Modules
  - Small group discussions (including case-based discussions)
  - Didactic Lectures from visiting faculty or topic experts
  - Didactic Lectures from core program faculty
  - Optional Elective
  - Mandatory Rotation
  - SGM integration in all relevant lecture topics
  - Other: \_\_\_\_\_
10. Is sexual orientation and gender-identity included in your institution/group's non-discrimination clause?
- Both sexual orientation and gender-identity
  - Sexual orientation only
  - Gender-identity only
  - Neither sexual orientation or gender identity
  - Don't know
11. Do you currently have out SGM faculty as part of your residency program?
- Yes
  - No/Unsure
12. Do you currently have out SGM residents as part of your residency?
- Yes
  - No/Unsure
13. Did your program interview SGM applicants in the last three years?
- Yes.
  - No/Unsure
14. Does your program use any targeted strategies to recruit SGM applicants to your program?  
[textbox]
